# Supplementary material for: Resolved stress analysis, failure mode, and fault-controlled fluid conduits in low-permeability strata
Source: Copernicus journal article supplement (doi:10.5194/se-2020-17), 2020-02-18
Supplement: Supplementary file [file se-2020-17-RC2-supplement.pdf]

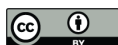

# Resolved stress analysis, failure mode, and fault-controlled fluid conduits in low-permeability strata

David A. Ferrill<sup>1</sup>, Kevin J. Smart<sup>1</sup>, Alan P. Morris<sup>1</sup>

<sup>1</sup> Southwest Research Institute, 6220 Culebra Road, San Antonio, Texas 78238-5166, USA

5 Correspondence to: David A. Ferrill (dferrill@swri.org)

**Abstract.** Failure behaviour can strongly influence deformation-related changes in volume, which is critical in the formation of fault and fracture porosity and conduit development in low permeability rocks. This paper explores the failure modes and deformation behaviour of faults within the mechanically layered Eagle Ford Formation, an ultra-low permeability self-sourced oil and gas reservoir and aquitard exposed in natural outcrop in southwest Texas, U.S.A. Particular emphasis is placed on analysis of the relationship between slip versus opening along fault segments, and the associated variation in dilation tendency versus slip tendency. Results show that the failure mode and deformation behaviour (dilation versus slip) relate in predictable ways to the mechanical stratigraphy, stress field, and specifically the dilation tendency and slip tendency. We conclude that dilation tendency versus slip tendency patterns on faults and other fractures can be analysed using detailed orientation or structural geometry data and stress information, and employed predictively to interpret deformation modes and infer volume change and fluid conduit versus barrier behaviour of structures.

## 1 Introduction

Faults and fractures often serve as conduits for fluid in low permeability rock (Barton et al., 1995; Caine et al., 1996; Zoback et al., 1996; Evans et al., 1997; Sibson and Scott, 1998; Ferrill and Morris, 2003; Faulkner et al., 2010), including self-sourced oil and gas reservoirs (Ferrill et al., 2014a, 2014b, 2020; Gale et al., 2014), or CO<sub>2</sub> reservoirs (Miocic et al., 2020), and reservoir cap-rock seals (e.g., Petrie et al., 2014). Permeability behaviour – flow pathway versus seal – can be directly related to the deformation modes along a fault, fracture, or fracture network (Carlsson and Olsson, 1979; Sibson, 1996, 1998, 2000, 2003; Ferrill et al., 2019a). In any applied stress field, multiple deformation features may form coevally with failure initiation at varying orientations and in different failure modes (e.g., Hancock, 1985; Lee et al., 1997; Lee and Wiltschko, 2000; Ferrill & Morris, 2003; Schöpfer et al., 2006; Buseti et al., 2014; Maher, 2014; Smart et al., 2014; Douma et al., 2019; Boersma et al., 2020). Deformation behaviour, and in particular positive or negative dilation versus shear, is closely related to the orientation of the failure plane or zone with respect to the stress field at the time of deformation (e.g., Ramsey and Chester, 2004; Ferrill et al., 2017b). Recent work has shown that failure or reactivation mode along faults can be directly related to the dilation tendency versus slip tendency on the fault in the stress field at the time of deformation (**Fig. 1**; Ferrill et al., 2012, 2017a, 2019b).

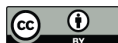

30 In this paper, we explore the variability of resolved stress patterns along well-exposed and preserved, small  
displacement normal faults in the Eagle Ford Formation, and the relationship between dilation tendency, slip tendency, and  
deformation behaviour (failure mode) at various positions along faults following the approach presented by Ferrill et al.  
(2019a). The faults at the study site exhibit many segments that have measureable shear displacement and slickenlines, and  
other segments that have dilated and are partially or fully mineralized with calcite from the paleo-movement of aqueous  
35 fluids. Observations show that failure modes along individual faults can vary dramatically over short distances (a few cm),  
governed by the lithologic changes and fault segment interaction. Shear versus dilational behaviour relates directly to the  
mechanical stratigraphy and the orientation of the failure zone within the stress field at the time of deformation (Ferrill and  
Morris, 2003). This study provides a clear example of how faults can serve as fluid conduits in mechanically layered low  
permeability strata. Furthermore, the use of dilation tendency versus slip tendency patterns shows significant potential for  
40 predicting failure or reactivation mode on faults or fractures, and the related conduit versus seal behaviour of those  
structures, applicable to detailed faults and fractures mapped or imaged in the subsurface.

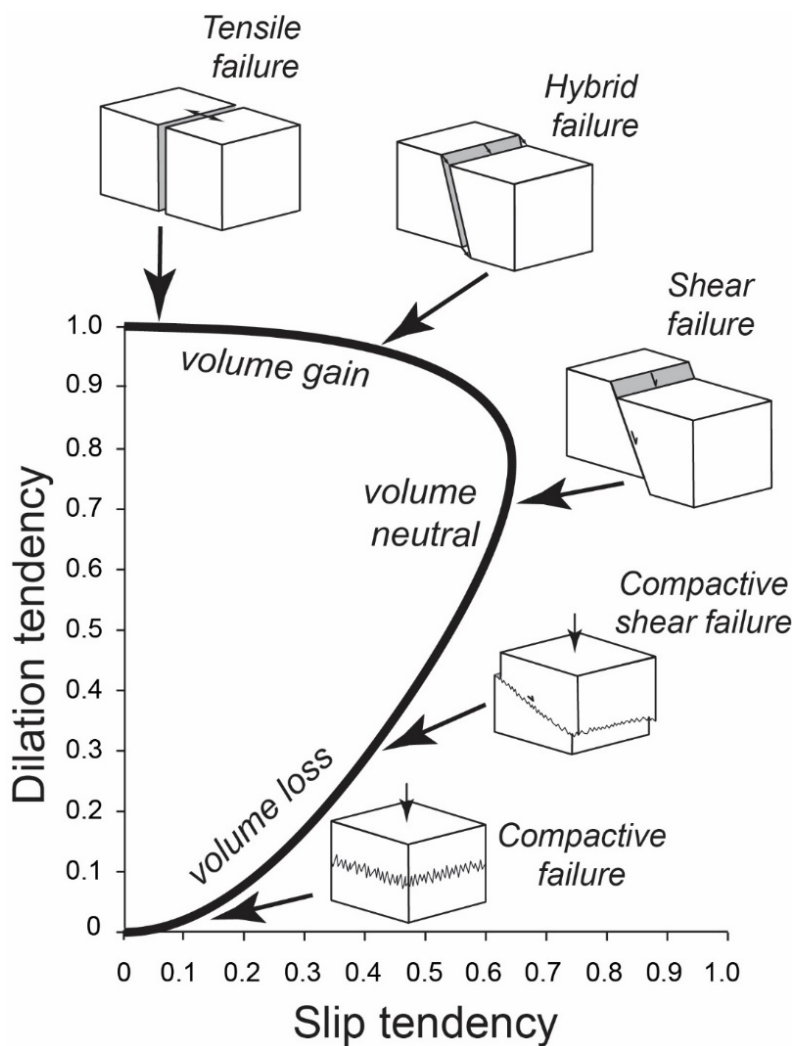

**Figure 1.** General graphical relationship between maximum slip tendency and dilation tendency, and associated rock failure modes and volume change (from Ferrill et al., 2019a). As discussed by Ferrill et al. (2019a), analysing faults in this parameter space shows promise for prediction of the failure or deformation modes and the associated conduit versus seal behaviour. For purposes of this illustration, representative deformation features are shown for a normal faulting stress regime.



## 50 1 Background

The Cretaceous Eagle Ford Formation has become an important self-sourced unconventional oil and gas reservoir in south Texas, U.S.A. (Robinson, 1997; Martin et al., 2011; Cusack et al., 2010; Bodziak et al., 2014; Breyer et al., 2016), and an organic rich source rock for migrated oil produced out of other formations including the directly overlying Austin Chalk and underlying Buda Limestone (Edman and Pitman, 2010; Zumberge et al., 2016; Kornacki, 2018). In up-dip regions closer to  
55 the Eagle Ford outcrop belt along the Balcones fault zone, the Eagle Ford is an aquitard that forms a barrier to communication between aquifers including the overlying Austin Chalk, underlying Buda Limestone, and the deeper Edwards Aquifer (Livingston et al., 1936; Maclay and Small, 1983; Maclay, 1989; Ferrill et al., 2004, 2019b).

Analyses of the Eagle Ford oil and gas reservoir have shown the formation to have ultra-low permeabilities (50-1500 nanodarcies; Denney, 2012). This helps to explain the retention of self-sourced oil and gas in the formation, as well as the  
60 role of the formation as a barrier to fluid movement. Recent outcrop studies, however, have shown that small-displacement faults – displacements of cm's to m's – within organic rich Eagle Ford Formation and overlying Austin Chalk that never reached oil window conditions necessary for hydrocarbon maturation are locally mineralized with calcite that contains fluorescent liquid hydrocarbon inclusions (Ferrill et al., 2014a, 2017a, 2020). Calcite cements in fault zone veins within the Eagle Ford Formation and Austin Chalk show crack-seal textures indicative of numerous incremental slip events, providing  
65 clear indication of porosity generation and water movement from which the calcite precipitated (Ferrill et al., 2014a, 2017a, 2020). Migrated-oil inclusions in the calcite indicate longer distance up-dip travel of oil (likely tens of km) from areas where source rock strata reached oil generation conditions (Ferrill et al., 2020). Analyses of homogenization temperatures for two-phase (liquid-vapour) inclusions indicate fluid trapping at 1.4 to 2.9 km depths, and possibly as deep as 4.2 km (Ferrill et al., 2014a, 2017a, 2020). These trapping depth estimates indicate that the faults analysed here formed and  
70 remained active at these depths and are not near-surface phenomena.

Refracted fault shapes and associated localization of dilation and cementation along these faults indicate the intricate interplay between mechanical stratigraphy and failure modes, and bed-to-bed switching in failure and reactivation behaviour that led to formation of conduits for fluid flow through the otherwise nearly impermeable Eagle Ford Formation. Better understanding of the structural processes that influence formation of fault controlled fluid conduits is needed to evaluate



75 migration and accumulation of hydrocarbons, as well as integrity of very low permeability sealing strata. Furthermore, this improved understanding could also aid interpretation of failure modes and fracture geometries produced by hydraulic fracturing in the Eagle Ford Formation and other mechanically layered unconventional reservoirs.

### 3 Methods

#### 80 3.1 Fault segment characterization

Analyses in this paper focus on three faults in the Eagle Ford Formation exposed in bluffs along Sycamore Creek in southwest Texas. These faults were previously discussed and analysed by Ferrill et al. (2017a) and were selected from the larger population of faults at Sycamore Bluffs for detailed analysis because they (i) represent the spectrum of displacements on faults in the exposure, (ii) are in close proximity to each other, and (iii) cut approximately the same portion of the  
85 stratigraphic section. The three faults, in order of increasing displacement, are the (i) Textbook fault (max. throw in exposure = 10 cm; **Fig. 2**), (ii) Spanish Goat fault (max. throw in exposure = 35 cm), and (iii) Big Indigo fault (max. throw in exposure = 6 m). Fault segments through different lithologic beds were mapped in the field directly onto digital photographs, and strike, dip, and rake (where slickenlines were visible) were measured using Brunton compass. Displacements were measured using metric measuring tape for the smaller displacement faults (i.e., Textbook fault, Spanish  
90 Goat fault, and NW segment of Big Indigo fault). The displacement of several meters and irregularity of the outcrop surface precluded direct field measurement of displacement on the main strand of the Big Indigo fault. Consequently, we surveyed the main trace of the Big Indigo fault using a spatial scanning system (Trimble VX™ Spatial Station) to measure the three-dimensional positions of offset marker beds at their hanging wall and footwall cutoffs, and from those data extracted displacements. The three faults analysed here exhibit significant changes in dip of the failure surfaces, and exhibit variation  
95 in deformation behaviour, including slickenlined slip surfaces and dilational segments that are partially or completely calcite-filled (**Fig. 2**).

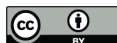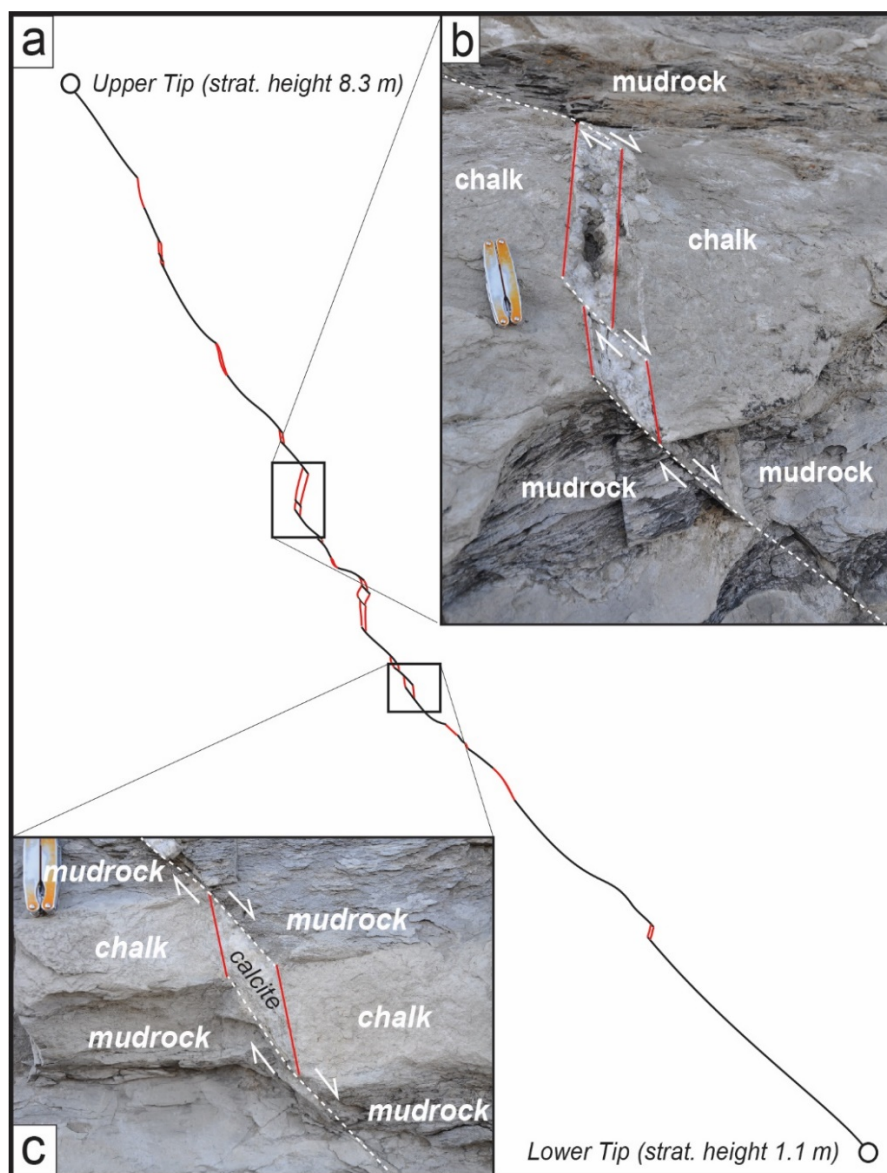

**Figure 2.** Details of the Textbook fault in Eagle Ford Formation outcrop at Sycamore Bluffs in southwest Texas. See Ferrill et al. (2017a) for additional detail on the exposure and faults. The section is heterolithic, including primarily chalk, marl, and calcareous mudrock. Faults tend to be represented by shear failure through mudrock, and hybrid failure through chalk beds, resulting in refracted fault profiles that exhibit dilation of steep segments through chalk beds. Dilation segments are represented by mechanical aperture that is partially cemented with calcite (see part **b**) or completely cemented with calcite (see part **c**).



## 105 3.2 Stress field interpretation

Stress inversion was performed using orientations of fault slip surfaces and displacement measurements from measured slip surfaces along the Textbook, Spanish Goat, and Big Indigo faults. The inversion was performed using the technique of McFarland et al. (2012) as implemented in 3DStress v. 5.1 (Morris et al., 2016). We adjusted the stress tensor solution slightly to align the intermediate principal compressive stress ( $\sigma_2$ ) orientation with the minimum eigenvector from the fault population because we expect  $\sigma_2$  to be parallel to the intersection line direction for a conjugate normal fault population (Anderson, 1951; Thompson, 2015).

## 3.3 Dilation tendency and slip tendency analysis

Dilation tendency ( $T_d$ ) was defined by Ferrill et al. (1999) by the following Eq. (1):

$$115 \quad T_d = \frac{(\sigma_1 - \sigma_n)}{(\sigma_1 - \sigma_3)}, \quad (1)$$

where  $\sigma_n$  = resolved normal stress,  $\sigma_1$  = maximum principal compressive stress, and  $\sigma_3$  = minimum principal compressive stress. Slip tendency ( $T_s$ ), was defined by Morris et al. (1996) by the following Eq. (2):

$$T_s = \frac{\tau}{\sigma_n}, \quad (2)$$

where  $\tau$  = resolved shear stress. Dilation tendency and slip tendency analyses were performed in 3DStress, using the derived stress tensor and the measured orientations of the deformation features.

## 4 Results

### 4.1 Fault segment characterization

Data were collected from 141 measurement positions along the three faults, tracking refracted faults through multiple lithologic layers. The three faults represent progressive stages of increasing fault displacement and fault zone development. The faults have refracted fault profiles with numerous dip changes (e.g., **Fig. 2a**). These refracted profiles are represented not only by changes in dip, but also by changes in deformation behaviour, ranging from thin slip surfaces exhibiting slickenlines to thick calcite veins with crack-seal textures representing significant dilation and numerous dilational slip

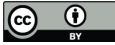

events. Some dilational fault segments are only partially filled with calcite cement and exhibit euhedral crystal terminations indicative of crystal growth into open voids (**Fig. 2b**). Most of the dilational fault segments, however, are completely filled with calcite (e.g., **Fig. 2c**), as described in Ferrill et al. (2017a). Calcite-cemented fault segments tend to have steep to vertical dips ( $\geq 75^\circ$ ). In contrast, gently to moderately dipping fault segments ( $< 30\text{--}75^\circ$ ) typically are marked with slickenlines, lack calcite cement, and reflect little or no positive dilation suggestive of shear or compactive-shear deformation.

## 4.2 Stress field interpretation

The interpreted stress tensor used in the dilation tendency and slip tendency analyses is defined by the following relative magnitudes and orientations of the principal stresses as follows (**Fig. 3**):  $\sigma_1 = 1.00$ , azimuth  $170^\circ$ , plunge  $71^\circ$ ;  $\sigma_2 = 0.65$ , azimuth  $019^\circ$ , plunge  $17^\circ$ ;  $\sigma_3 = 0.30$ , azimuth  $286^\circ$ , plunge  $9^\circ$ . As noted earlier, we slightly adjusted the orientation of  $\sigma_2$  from the initial stress inversion to align with the minimum eigenvector from the fault slip surface population (i.e., orientation changed from  $017^\circ/25^\circ$  to  $019^\circ/17^\circ$ ). If we assume approximately 2 km of overburden with an average density of  $2500 \text{ kg/m}^3$ , and adjust for overpressured conditions ( $0.018 \text{ MPa/m}$ ), the three principal effective stress ( $\sigma'$ ) magnitudes are estimated to be (i)  $\sigma'_1 = \sim 15 \text{ MPa}$ , (ii)  $\sigma'_2 = \sim 10 \text{ MPa}$ ; and (iii)  $\sigma'_3 = \sim 5 \text{ MPa}$ .



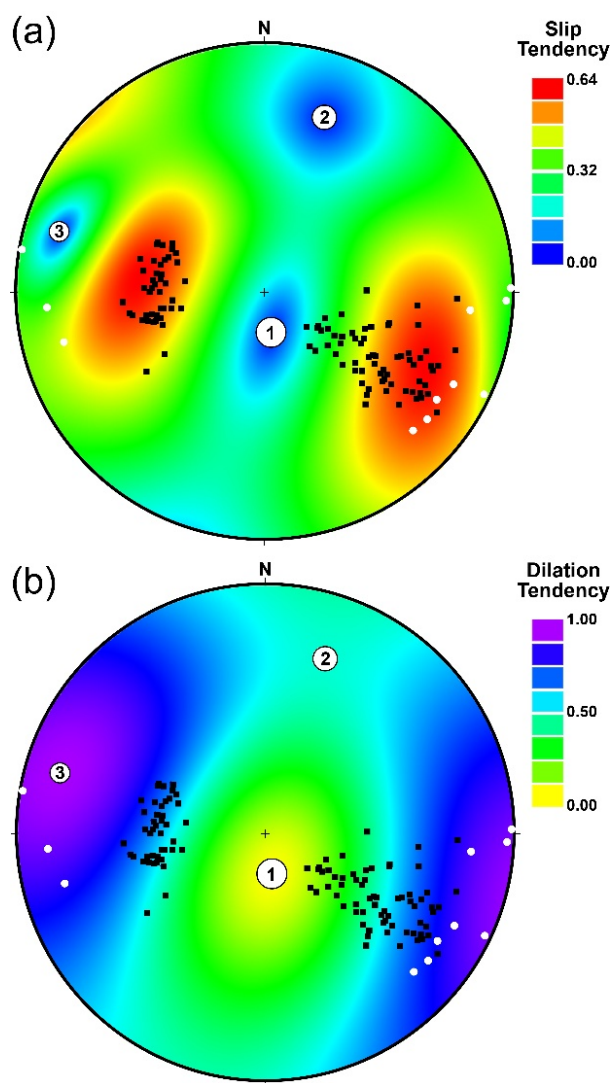

145

**Figure 3.** Equal-angle stereonet plots of (a) slip tendency and (b) dilation tendency (bottom) with poles to shear segments (black dots) and calcite cemented dilational segments (white dots) measured from the Textbook, Spanish Goat, and Big Indigo faults at Sycamore Bluffs. Larger dots labelled 1, 2, and 3 represent orientations of the maximum, intermediate, and minimum principal compressive stresses,  $\sigma_1$ ,  $\sigma_2$ , and  $\sigma_3$ , respectively. See text for further discussion of the inferred stress tensor.



155

### 4.3 Dilation tendency and slip tendency analysis

The three faults investigated here each show a diverse spectrum of dilation tendency and slip tendency associated with their orientation (primarily dip but also strike) changes (**Fig. 4**). Comparing the dilation tendency and slip tendency profiles shows segments that fall into 3 primary categories: (i) low dilation tendency and low slip tendency, (ii) moderately high dilation tendency and high slip tendency, and (iii) high dilation tendency and low slip tendency. Cross plotting dilation tendency versus slip tendency for measured fault orientations (strike and dip measurements) shows this diverse spectrum of resolved stress characteristics (**Fig. 5**). Differentiating between observations of calcite vein cement versus slickenlines associated with these fault segments shows a clear pattern of calcite vein cement associated with fault segments that have high dilation tendency and low to moderately high slip tendency (✕ symbol in **Fig. 5**). Slickenlines were observed on fault segments that have moderately high to low dilation tendency and high to moderately low slip tendency (+ symbol in **Fig. 5**).

The moderate to high slip tendency and high dilation tendency of the steepest segments (dips  $>75^\circ$ , red points) is consistent with hybrid failure. High slip tendency and moderately high dilation tendency for moderate to steep fault segments (dips of  $45^\circ$ - $75^\circ$ , green and gold points) is consistent with shear failure, whereas the moderate to low slip tendency and low dilation tendency of the most gently dipping segments (dips  $<45^\circ$ , light blue and dark blue points) is more consistent with compactive shear failure, although no definitive evidence of compactive shear (e.g., slickolites) was observed in the field (see **Fig. 1** for comparison). The pattern of dilation tendency versus slip tendency on the fault segments matches well with the deformation processes indicated by vein material indicative of dilation versus absence of vein material and presence of slickenlines indicative of sliding (**Fig. 5**).

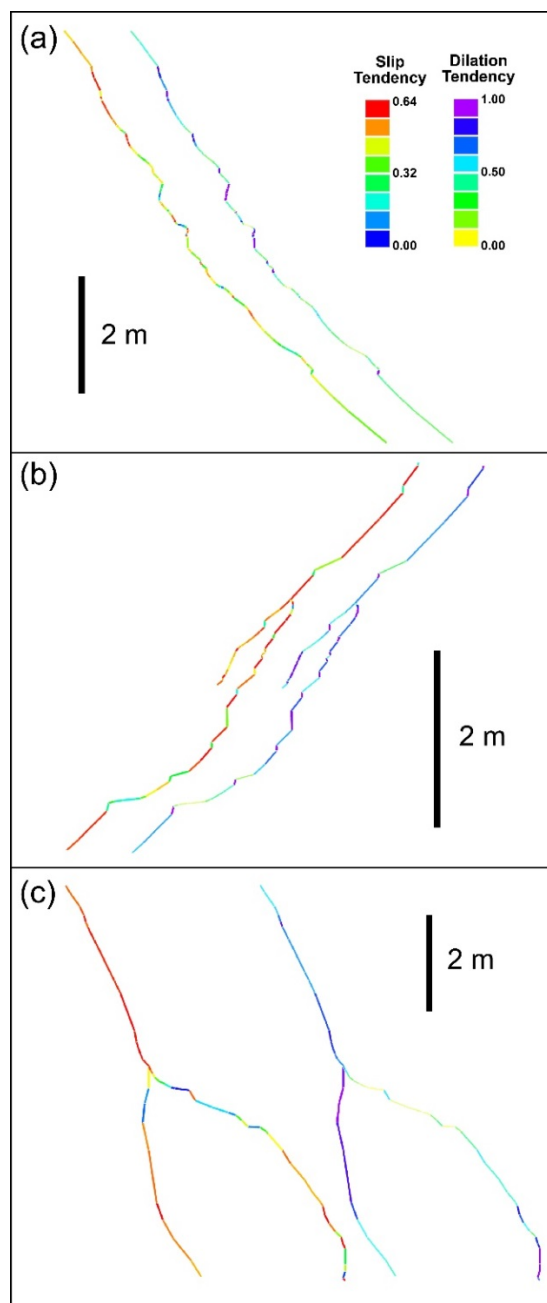

**Figure 4.** Slip tendency (left profile of each pair) and dilation tendency (right profile of each pair) profiles of the (a) Textbook, (b) Spanish Goat, and (c) Big Indigo faults at Sycamore Bluffs using the inverted stress tensor described in the text and illustrated in terms of slip tendency and dilation tendency in **Fig. 3**. Although these plots are similar to those presented in Ferrill et al. (2017a), they have been updated to reflect the inverted stress state shown in **Fig. 3**.

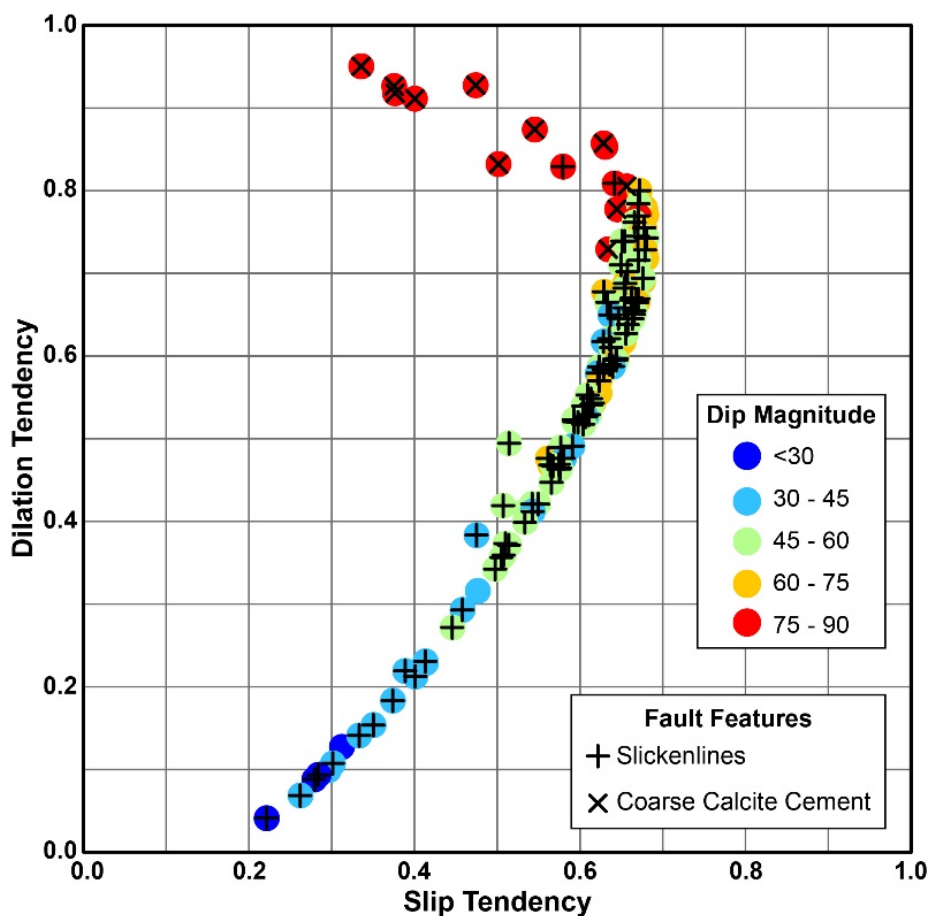

180 **Figure 5.** Comparison of dilation tendency and slip tendency for measured fault segments of the Textbook, Spanish Goat, and Big Indigo faults, color-coded by dip, with + and × symbols indicating presence of slickenlines or coarse calcite cement, respectively. The few colored dots that lack additional symbols represent shear segments that either lack slickenlines, or slickenlines could not be seen due to the planar outcrop surface in some locations. The moderate to high slip tendency and high dilation tendency of the steep segments (dips  $>75^\circ$ , red points) are consistent with hybrid failure, whereas the moderate to low slip tendency and low dilation tendency of the most gently dipping segments (dips  $<45^\circ$ , light blue and dark blue points) are suggestive of compactive shear. See **Fig. 1** for comparison.



## 190 5 Discussion

Fault refraction through the mechanically layered Eagle Ford lithostratigraphic section led to conduit development at dilational segments along faults (**Fig. 6a**). These conduits are structurally controlled and form along the fault/bedding intersection within more competent (chalk) beds where steep fault segments experienced dilation (dilational jogs; Ferrill and Morris, 2003; Ferrill et al. 2014a). Conduits tend to parallel the intermediate principal stress direction, which is horizontal or  
205 nearly horizontal in normal and thrust faulting stress regimes (e.g., Ferrill et al., 2019a, 2020), and vertical in a strike slip regime (Giorgetti et al., 2016; Carlini et al., 2019).

For a cohesionless fault, slip tendency at the initiation of slip is expected to equal the coefficient of friction on the fault (e.g., Byerlee, 1978; Morris et al., 1996). A fault that has slip tendency equal to the coefficient of friction is considered “critically stressed” (Stock et al., 1985; Barton et al., 1995; Morris et al., 1996; Zoback et al., 1996). This study shows that  
200 the slip tendency was highly variable along the refracted faults at the time of their active slip. Slip tendencies (**Fig. 5**) ranged from high values ( $>0.6$ ), consistent with coefficients of friction of 0.6 to 0.85 described by Byerlee (1978), to low or very low values (0.4 to  $<0.2$ ) on gently dipping fault segments that would make sense for activity only for low coefficients of friction associated with weak rock (see coefficient of friction summary in Ferrill et al., 2017b). Different rock types inherently have different friction coefficients, so a mechanical multilayer like the Eagle Ford Formation that includes chalk,  
205 marl, mudrock, and volcanic ash should be expected to have variable slip tendencies required to overcome the variable friction coefficients through different mechanical layers (**Fig. 6b**).

The clear relationships displayed in the dilation tendency versus slip tendency pattern, the failure and reactivation modes, and the mechanical layering, demonstrates the importance of understanding this interplay when investigating fault-related permeability development. Unconventional hydrocarbon reservoirs and low-permeability seal strata for aquifers, oil  
210 and gas reservoirs, and CO<sub>2</sub> reservoirs or sequestration sites are commonly not lithologically homogeneous, but instead are heterolithic and mechanically layered (e.g., Petrie et al., 2014; Miocic et al., 2020). Consequently, failure modes and failure orientations are likely to vary bed to bed and result in refracted fault shapes and fluid pathways similar to those discussed here.

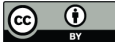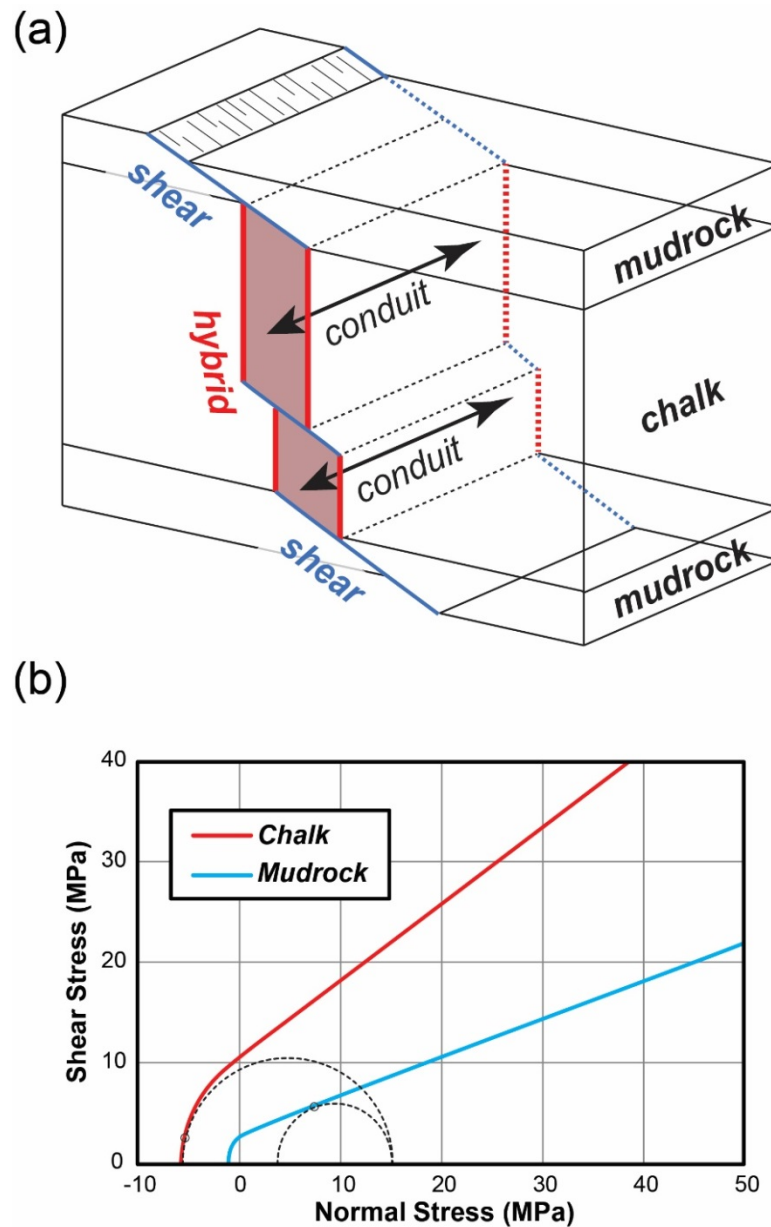

215 **Figure 6.** (a) Schematic block diagram illustrating the change in failure angle and mode from mudrock to chalk, and the associated dilation of the steeper hybrid segment and formation of a fault conduit parallel to the fault-bedding intersection direction. (b) Interpreted failure envelopes and stress circles for chalk and mudrock at the time of failure with a uniform effective overburden stress of 20 MPa (corrected for pore fluid pressure) with hybrid failure predicted for the more competent chalk beds and shear failure predicted for the less competent mudrock.



## 220 6 Conclusions

Faults investigated here were active with refracted dip profiles with segments that experienced widely varying dilation tendencies and slip tendencies at the time of activity. Deformation modes correlate with the dilation and slip tendency changes, and show that neither slip tendency nor dilation tendency alone are complete indicators of fault zone behaviour.

The integrated analysis of dilation tendency and slip tendency, however, can be a very effective means to predict deformation behaviour for fault segments or other structural features (fractures, layer boundaries, or mechanical interfaces).

*Acknowledgements.* Slip and dilation tendency analyses were performed using 3DStress® v. 5.1. We thank Janice Moody and Heath Grigg for allowing us research access to the Rancho Rio Grande. Financial support for field work in this study was provided by Southwest Research Institute's Eagle Ford joint industry project, funded by Anadarko Petroleum Corporation, BHP Billiton, Chesapeake Energy Corporation, ConocoPhillips, Eagle Ford TX LP, EP Energy, Hess Corporation, Marathon Oil Corporation, Murphy Exploration and Production Company, Newfield Exploration Company, Pioneer Natural Resources, and Shell. Additional analyses in this manuscript were also supported in part by SwRI® Internal Research and Development Project R8940. We thank Ronald McGinnis, Dan Lehrmann, Erich DeZoeten, Sarah Wigginton, and Zach Sickmann for their contributions to data collection.

## 235 References

- Anderson, E. M.: The dynamics of faulting and dyke formation with applications to Britain. Oliver and Boyd, Edinburgh, 1951.
- Barton, C. A., Zoback, M. D., and Moos, D.: Fluid flow along potentially active faults in crystalline rock. *Geology*, 23, 683–686, 1995.
- 240 Bodziak, R., Clemons, K., Stephens, A., and Meek, R.: The role of seismic attributes in understanding the 'frac-able' limits and reservoir performance in shale reservoirs: An Example from the Eagle Ford Shale, South Texas, USA, *Am. Assoc. Pet. Geol. Bull.*, 98, 2217-2235, 2014.



- Boersma, Q. D., Douma, L. A. N. R., Bertotti, G., and Barnhoorn, A.: Mechanical controls on horizontal stresses and fracture behaviour in layered rocks: A numerical sensitivity analysis. *J. Struct. Geol.*, 130, 245  
<https://doi.org/10.1016/j.jsg.2019.103907>, 2020.
- Breyer, J. A.: The Eagle Ford Shale: a Renaissance in U.S. Oil Production: American Association of Petroleum Geologists, Memoir 110, 399 p. 2016.
- Busetti, S., Jiao, W., and Reches, Z.: Geomechanics of hydraulic fracturing microseismicity: Part 1. Shear, hybrid, and tensile events. *Am. Assoc. Pet. Geol. Bull.*, 98, 2439-2457, 2014.
- 250 Byerlee, J.: Friction of rocks. *Pure and Applied Geophysics*, 116, 615-626, 1978.
- Caine, J. S., Evans, J. P., and Forster, C. B.: Fault zone architecture and permeability structure, *Geology*, 24, 1025-1028, 1996.
- Carlini, M., Viola, G., Mattila, J., and Castellucci, L.: The role of mechanical stratigraphy on the refraction of strike-slip faults, *Solid Earth*, 10, 343–356, <https://doi.org/10.5194/se-10-343-2019>, 2019.
- 255 Carlsson, A. and Olsson, T.: Hydraulic conductivity and its stress dependence. *Proceedings, Paris, Workshop on Low-Flow, Low-Permeability Measurements in Largely Impermeable Rocks*, 249–259, 1979.
- Cusack, C., Beeson, J., Stoneburner, D., and Robertson, G.: The discovery, reservoir attributes, and significance of the Hawkville Field and Eagle Ford Shale trend, Texas, *Gulf Coast Association of Geological Societies Transactions*, 60, 165-179, 2010.
- 260 Denney, D.: Improve unconventional reservoir completion and stimulation effectiveness. *J. Petrol. Technol.*, 64(10), <http://dx.doi.org/10.2118/1012-0115-JPT>, 2012.
- Douma, L. A. N. R., Regelink, J. A., Bertotti, G., Boersma, Q. D., and Barnhoorn, A.: The mechanical contrast between layers controls fracture containment in layered rocks, *J. Struct. Geol.*, 127, <https://doi.org/10.1016/j.jsg.2019.06.015>, 2019.
- 265 Edman, J. D. and Pitman, J. K.: Geochemistry of Eagle Ford Group source rocks and oils from the First Shot Field area, Texas, *Trans. GCAGS* 60, 217-234, 2010.





- Evans, J. P., Forster, C. B., and Goddard, J. V.: Permeability of fault-related rocks, and implications for hydraulic structure of fault zones. *J. Struct. Geol.*, 19, 1393-1404, 1997.
- Faulkner, D. R., Jackson, C. A. L., Lunn, R. J., Schlische, R. W., Shipton, Z. K., Wibberley, C. A. J., and Withjack, M. O.:  
 270 A review of recent developments concerning the structure, mechanics and fluid flow properties of fault zones. *J. Struct. Geol.*, 32, 1557-1575, 2010.
- Ferrill, D. A. and Morris, A. P.: Dilational normal faults, *J. Struct. Geol.*, 25, 183-196, [https://doi.org/10.1016/S0191-8141\(02\)00196-7](https://doi.org/10.1016/S0191-8141(02)00196-7), 2003.
- Ferrill, D. A., Winterle, J., Wittmeyer, G., Sims, D., Colton, S., Armstrong, A., and Morris, A. P.: Stressed rock strains  
 275 groundwater at Yucca Mountain, Nevada, *GSA Today*, 9, 1–8, 1999.
- Ferrill, D. A., Sims, D. W., Waiting, D. J., Morris, A. P., Franklin, N., Schultz, A. L.: Structural Framework of the Edwards Aquifer recharge zone in south-central Texas, *Geol. Soc. Am. Bull.* 116, 407–418, 2004.
- Ferrill, D. A., McGinnis, R. N., Morris, A. P., and Smart, K. J.: Hybrid failure: Field evidence and influence on fault refraction, *J. Struct. Geol.*, 42, 140–150, <https://doi.org/10.1016/j.jsg.2012.05.012>, 2012.
- 280 Ferrill, D. A., McGinnis, R. N., Morris, A. P., Smart, K. J., Sickmann, Z. T., Bentz, M., Lehrmann, D., and Evans, M. A.: Control of mechanical stratigraphy on bed-restricted jointing and normal faulting: Eagle Ford Formation, south-central Texas, U.S.A., *Am. Assoc. Pet. Geol. Bull.*, 98, 2477–2506, 2014a.
- Ferrill, D. A., Morris, A. P., Hennings, P. H., and Haddad, D. E.: Faulting and fracturing in shale and self-sourced reservoirs: Introduction, *Am. Assoc. Pet. Geol. Bull.*, 98, 2161-2164, 2014b.
- 285 Ferrill, D. A., Evans, M. A., McGinnis, R. N., Morris, A. P., Smart, K. J., Wigginton, S. S., Gulliver, K. D. H., Lehrmann, D., de Zoeten, E., and Sickmann, Z.: Fault zone processes in mechanically layered mudrock and chalk, *J. Struct. Geol.*, 97, 118-143, 2017a.
- Ferrill, D. A., Morris, A. P., McGinnis, R. N., Smart, K. J., Wigginton, S. S., and Hill, N. J.: Mechanical stratigraphy and normal faulting, *J. Struct. Geol.*, 94, 275–302, <https://doi.org/10.1016/j.jsg.2016.11.010>, 2017b.

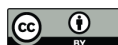

- 290 Ferrill, D. A., Smart, K. J., and Morris, A. P.: Fault failure modes, deformation mechanisms, dilation tendency, slip tendency, and conduits v. seals. in: Integrated Fault Seal Analysis, edited by: Ogilvie, S. R., Dee, S. J., Wilson, R. W. & Bailey, W. R., Geological Society, London, Special Publications, 496, <https://doi.org/10.1144/SP496-2019-7>, 2019a.
- Ferrill, D. A., Morris, A. P., and McGinnis, R. N.: Geologic structure of the Edwards (Balcones Fault Zone) Aquifer, in Sharp, J.M., Jr., Green, R.T., and Schindel, G.M., eds., The Edwards Aquifer: The Past, Present, and Future of a Vital  
 295 Water Resource: Geological Society of America Memoir 215, 171–188, [https://doi.org/10.1130/2019.1215\(14\),2019b](https://doi.org/10.1130/2019.1215(14),2019b).
- Ferrill, D. A., Evans, M. A., McGinnis, R. N., Morris, A. P., Smart, K. J., Lehrmann, D., Gulliver, K. D. H., and Sickmann, Z.: Fault zone processes and fluid history in Austin Chalk, southwest Texas, Am. Assoc. Pet. Geol. Bull., 104 (2), 245-283, <https://doi.org/10.1306/04241918168>, 2020.
- Gale, J. F. W., Laubach, S. E., Olson, J. E., Eichhubl, P., and Fall, A.: Natural fractures in shale: a review, Am. Assoc. Pet.  
 300 Geol. Bull., 98, 2165-2216, 2014.
- Giorgetti, C., Collettini, C., Scuderi, M. M., and Tesei, T.: Fault geometry and mechanics of marly carbonate multilayers: An integrated field and laboratory study from the Northern Apennines, Italy, J. Struct. Geol., 93, 1-16, 2016.
- Hancock, P. L.: Brittle microtectonics: principles and practice, J. Struct. Geol., 7, 437–457, 1985.
- Kornacki, A. S.: Production of migrated oil from the Eagle Ford source-rock reservoir at a moderate level of thermal  
 305 maturity: Unconventional Resources Technology Conference (URTeC), DOI 10.15530/urtec-2018-2871569, 16 p., 2018.
- Lee, Y.-J. and Wiltschko, D. V., 2000, Fault controlled sequential vein dilation: competition between slip precipitation rates in the Austin Chalk, Texas, J. Struct. Geol., 22, 1247–1260.
- Lee, Y.-J., Wiltschko, D. V., Grossman, E. L., Morse, J. W., and Lamb, W. M.: Sequential vein growth with fault  
 310 displacement: An example from the Austin Chalk Formation, Texas, J. Geophys. Res., 102, 22,611–22,628, 1997.
- Livingston, P., Sayre, A. N., White, W. N.: Water Resources of the Edwards Limestone in the San Antonio Area, Texas, United States Department of the Interior, Water-Supply Paper 773-B, 59-113, 1936.
- Maclay, R. W.: Edwards Aquifer in San Antonio: Its hydrogeology and management, Bulletin of the South Texas Geological Society, 30(4), 11–28, 1989.



- 315 Maclay, R. W. and Small, T. A.: Hydrostratigraphic subdivisions and fault barriers of the Edwards Aquifer, south-central Texas, USA, *Journal of Hydrology*, 61, 127–146, 1983.
- Maheer, H. D.: Distributed normal faults in the Niobrara Chalk and Pierre Shale of the central Great Plains of the United States, *Lithosphere*, 6, 319–334, 2014.
- Martin, R., Baihly, J., Malpani, R., Lindsay, G., and Atwood, L.: Understanding production from Eagle Ford-Austin Chalk system. In: *Society of Petroleum Engineers Annual Technical Conference and Exhibition*, 30 October e 2 November. Society of Petroleum Engineers, Denver, Colorado, 2011.
- 320 McFarland, J., Morris, A. P., and Ferrill, D. A.: Stress inversion using slip tendency, *Computers and Geosciences*, 41, 40–46, 2012.
- Miocic, J. M., Johnson, G., and Gilfillan, S. M. V.: Stress field orientation controls fault leakage at a natural CO<sub>2</sub> reservoir, Solid Earth, <https://doi.org/10.5194/se-2020-12>, 2020.
- 325 Morris, A. P., Ferrill, D. A., and Henderson, D. B.: Slip tendency analysis and fault reactivation, *Geology*, 24, 275–278, 1996.
- Morris, A. P., Ferrill, D. A., and McGinnis, R. N.: Using fault displacement and slip tendency to estimate stress states. *J. Struct. Geol.*, 83, 60–72, 2016.
- 330 Petrie, E. S., Evans, J. P., and Bauer, S. J.: Failure of cap-rock seals as determined from mechanical stratigraphy, stress history, and tensile-failure analysis of exhumed analogs. *Am. Assoc. Pet. Geol. Bull.*, 98, 2365–2389, 2014.
- Ramsey, J. M. and Chester, F. M.: Hybrid fracture and the transition from extension fracture to shear fracture. *Nature*, 428, 63–66, 2004.
- Robinson, C.R., 1997. Hydrocarbon source rock variability within the Austin Chalk and Eagle Ford Shale (Upper Cretaceous), East Texas, U.S.A. *Int. J. Coal Geol.* 34, 287–305.
- 335 Schöpfer, M. P. J., Childs, C., and Walsh, J. J.: Localization of normal faults in multilayer sequences. *J. Struct. Geol.*, 28, 816–833, 2006.
- Sibson, R. H.: Structural permeability of fluid-driven fault-fracture meshes, *J. Struct. Geol.*, 18, 1031–1042, [https://doi.org/10.1016/0191-8141\(96\)00032-6](https://doi.org/10.1016/0191-8141(96)00032-6), 1996.



- 340 Sibson, R. H.: Brittle failure mode plots for compressional and extensional tectonic regimes, *J. Struct. Geol.*, 20, 655–660,  
[https://doi.org/10.1016/S0191-8141\(98\)00116-3](https://doi.org/10.1016/S0191-8141(98)00116-3), 1998.
- Sibson, R. H.: Fluid involvement in normal faulting, *J. Geodyn.*, 29, 469–499, [https://doi.org/10.1016/S0264-3707\(99\)00042-3](https://doi.org/10.1016/S0264-3707(99)00042-3), 2000.
- Sibson, R. H.: Brittle-failure controls on maximum sustainable overpressure in different tectonic regimes, *Am. Assoc. Pet.*  
 345 *Geol. Bull.*, 87, 901–908, <https://doi.org/10.1306/01290300181>, 2003.
- Sibson, R. H. and Scott, J.: Stress/fault controls on the containment and release of overpressured fluids: examples from gold-  
 quartz vein systems in Juneau, Alaska; Victoria, Australia and Otago, New Zealand, *Ore Geol. Rev.*, 13, 293–306,  
[https://doi.org/10.1016/S0169-1368\(97\)00023-1](https://doi.org/10.1016/S0169-1368(97)00023-1), 1998.
- Smart, K. J., Ofoegbu, G. I., Morris, A. P., McGinnis, R. N., and Ferrill, D. A.: Geomechanical modeling of hydraulic  
 350 fracturing: Why mechanical stratigraphy, stress state, and pre-existing structure matter. *Am. Assoc. Pet. Geol. Bull.*, 98,  
 2237–2261, 2014.
- Stock, J. M., Healy, J. H., Hickman, S. H., and Zoback, M. D.: Hydraulic fracturing stress measurements at Yucca  
 Mountain, Nevada, and relationship to regional stress field, *J. Geophys. Res.*, 90, 8691–8706, 1985.
- Thompson, R. C.: Post-Laramide, collapse-related fracturing and associated production; Wind River Basin, Wyoming, *The*  
 355 *Mountain Geologist*, 52(4), 27–46, 2015.
- Zoback, M., Barton, C., Finkbeiner, T., and Dholakia, S.: Evidence for fluid flow along critically-stressed faults in  
 crystalline and sedimentary rock. In: Jones, G., Fisher, Q., Knipe, R. (Eds.), *Faulting, Faults Sealing and Fluid Flow in*  
*Hydrocarbon Reservoirs*, 47–48, University of Leeds, England, 1996.
- Zumberge, J., Illisch, H., and Waite, L.: Petroleum geochemistry of the Cenomanian-Turonian Eagle Ford oils of south  
 360 Texas, *AAPG Memoir* 110, 135–165, 2016.
